# Supplementary material for: A potential source of atmospheric sulfate from O 2 − -induced SO 2 oxidation by ozone
Source: Copernicus journal article supplement (doi:10.5194/acp-2018-1111), 2018-11-05
Supplement: Supplementary file 1 [file acp-2018-1111-supplement.pdf]

Supplement for

**A potential source of atmospheric sulfate from  $O_2^-$ -induced  $SO_2$  oxidation by ozone**

Narcisse Tchinda Tsona and Lin Du

Environment Research Institute, Shandong University, Binhai Road 72, 266237 Shandong, China

*Correspondence to:* Lin Du (lindu@sdu.edu.cn)

## S1 Determination of unimolecular rate constants and atmospheric lifetimes

The unimolecular rate constants of  $\text{O}_2\cdots\text{O}_2\text{S}-\text{O}_3\cdots(\text{H}_2\text{O})_{0-1}$  reaction (in reaction (R3)) are determined as:

$$k_{\text{uni}} = \frac{k_{\text{B}}T}{h} \times \exp\left(-\frac{\Delta G^\ddagger}{RT}\right) \quad (\text{S1})$$

where  $\Delta G^\ddagger$  is the Gibbs free energy barrier separating  $\text{O}_2\cdots\text{O}_2\text{S}-\text{O}_3\cdots(\text{H}_2\text{O})_{0-1}$  and the products,  $h$  is the Planck's constant,  $k_{\text{B}}$  is the Boltzmann constant and  $R$  is the molar gas constant. Based on these rate constants, the atmospheric lifetimes of  $\text{O}_2\cdots\text{O}_2\text{S}-\text{O}_3\cdots(\text{H}_2\text{O})_{0-1}$  are determined as

$$\tau = \frac{1}{k_{\text{uni}}} \quad (\text{S2})$$

## S2 Details on the determination of $K_{\text{eq}}$ and $p_{\text{H}_2\text{O}}$

For the  $\text{O}_2\text{SOO}^\cdot\cdots\text{H}_2\text{O}$  formation according to the equation

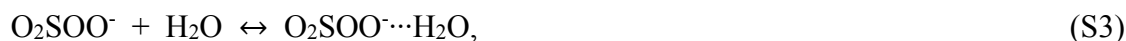

the equilibrium constant at different temperatures is calculated as

$$K_{\text{eq}} = (k_{\text{B}}T/p^0) \times \exp(-\Delta G/RT) \quad (\text{S4})$$

where  $\Delta G$  is the Gibbs free energy change for the  $\text{O}_2\text{SOO}^\cdot\cdots\text{H}_2\text{O}$  formation,  $k_{\text{B}}$  is the Boltzmann's constant,  $R$  is the molar gas constants and  $p^0$  is the atmospheric pressure.

The water vapor pressure is determined as  $p_{\text{H}_2\text{O}} = RH/100 \times p_{\text{H}_2\text{O}}^{\text{eq}}$ , where  $RH$  is the relative humidity and  $p_{\text{H}_2\text{O}}^{\text{eq}}$  is the equilibrium water vapor pressure calculated using the parametrization of Wagner and Prus<sup>1</sup>, revised by Murphy and Koop<sup>2</sup> as given below:

$$\ln p_{\text{H}_2\text{O}}^{\text{eq}} = 54.842763 - \frac{6763.22}{T} - 4.210 \times \ln T + 0.000367T + \tanh\{0.0415(T - 218.8)\} \left( 53.878 - \frac{1331.22}{T} - 9.44523 \times \ln T + 0.014025T \right) \quad (\text{S5})$$

This parametrization fits suitably to all temperatures encountered in the atmosphere ( $123 < T < 332$  K).

**Table S1:** Outer rate constants ( $k_{\text{out}}$ ) and inner rate constants ( $k_{\text{in}}$ ) of the  $\text{O}_2\text{SOO}^- + \text{O}_3$  reaction both in the absence and in the presence of water, calculated at 298.15 K using Equations (4) and (5), respectively, given in the main manuscript. Units are  $\text{cm}^3\text{molecule}^{-1}\text{s}^{-1}$ .

|                       | $k_{\text{out}}$       | $k_{\text{in}}$        |
|-----------------------|------------------------|------------------------|
| Unhydrated reaction   | $8.25 \times 10^{-10}$ | $1.27 \times 10^{-14}$ |
| Monohydrated reaction | $8.03 \times 10^{-10}$ | $2.67 \times 10^{-4}$  |

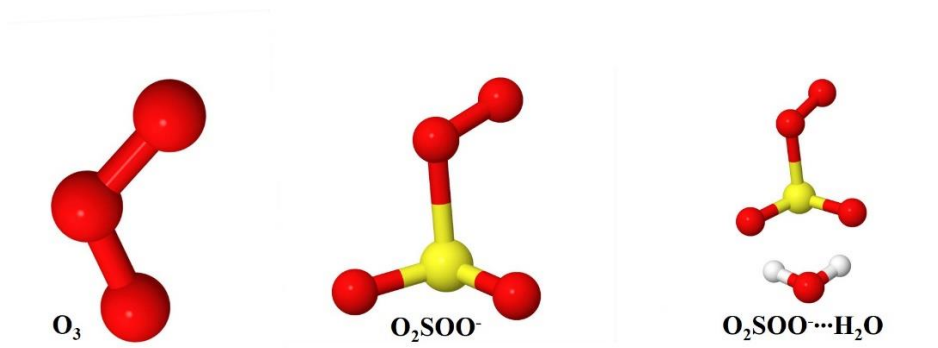

**Figure S1** Optimized structures of the different reactants species in reaction (R1), calculated with the M06-2X/aug-cc-pVTZ method.

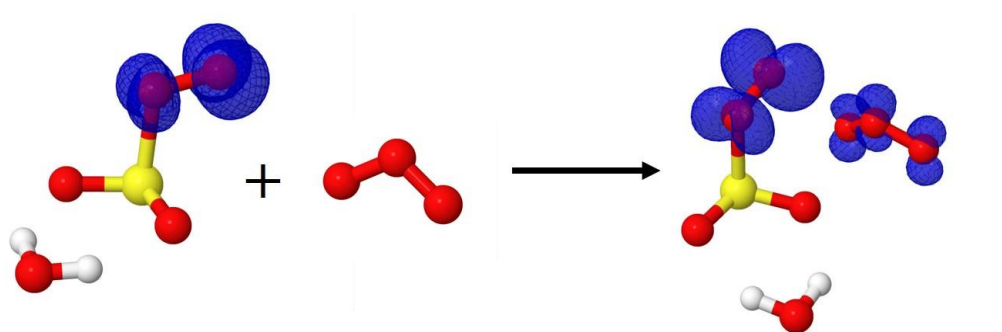

**Figure S2** Formation of the  $\text{O}_3 \cdots \text{O}_2\text{SOO}^- \cdots \text{H}_2\text{O}$  from  $\text{O}_3$  and  $\text{O}_2\text{SOO}^- \cdots \text{H}_2\text{O}$  collision. The spin density indicates the migration of the extra charge from  $\text{O}_2\text{SOO}^-$  in the reactant state to  $\text{O}_3$  in the product state.

## References

1. Wagner, W., Pruss, A. International Equations for the Saturation Properties of Ordinary Water Substance. Revised According to the International Temperature Scale of 1990. Addendum to *J. Phys. Chem. Ref. Data* 16, 893 (1987). *J. Phys. Chem. Ref. Data* **1993**, 22, 783-787.
2. Murphy, D. M., Koop, T. Review of the Vapour Pressures of Ice and Supercooled Water for Atmospheric Applications. *Q. J. R. Meteorol. Soc.* **2005**, 131, 1539-1565.
